# Supplementary material for: No Evidence That Soluble TACI Induces Signalling via Membrane-Expressed BAFF and APRIL in Myeloid Cells
Source: PubMed Central journal article supplement (PMC3631189; doi:10.1371/journal.pone.0061350), 2013-04-19
Supplement: pone.0061350.s001.pdf [file pone.0061350.s001.pdf]

| Internal # | Target                        | Antibody |     | Supplier, Cat N°      | Dil. WB |
|------------|-------------------------------|----------|-----|-----------------------|---------|
| 301        | Phospho-p42/44 (P-ERK)        | mIgG1    | mAb | Sigma 015K4757        | 1/5000  |
| 303        | Phospho-I $\kappa$ B $\alpha$ | mIgG1    | mAb | Cell signalling 9246S | 1/2000  |
| 306        | Phospho-JNK                   | rabbit   | pAb | Biosource 44-682 G    | 1/1000  |
| 322        | Phospho-Akt Ser473            | mIgG2b   | mAb | Cell signalling 4051  | 1/1000  |
| 440        | mI $\kappa$ B $\alpha$        | rabbit   | pAb | Cell signalling 9242  | 1/1000  |
| 443        | Tubulin                       | mIgG1    | mAb | Sigma T5168           | 1/1000  |
| 556        | ERK1                          | goat     | pAb | Santa Cruz sc-094-G   | 1/2000  |
| 985        | p100/52                       | rabbit   | pAb | Cell signalling 4882  | 1/1000  |
| 1094       | Akt                           | rabbit   | mAb | Cell signalling 9272  | 1/1000  |
|            | CD3 zeta                      | mIgG1    | mAb | Santa Cruz sc-1239    | 1/1000  |

**Figure S1. List of antibodies used in the study.**

Multiple revelations were performed in the following order

For Fig. 1: 301/985/322/556/1094 and 303/440/306/443.

For Fig. 2A: 332/306/301/303/440/443/556/1094.

For Fig. 2B: 322/306/303/301/440/556/443.

For Fig. 2C: 301/556/306 and 303/440/322.

For Fig. 3: 322/301/556/1094 and 306/303/440/443.
